# Supplementary material for: Spatial evaluation of healthcare accessibility across archipelagic communities of Maluku Province, Indonesia
Source: PLOS Glob Public Health. 2023 Mar 9;3(3):e0001600. doi: 10.1371/journal.pgph.0001600 (PMC10021735; doi:10.1371/journal.pgph.0001600)
Supplement: S3 Table — (XLSX) [file pgph.0001600.s004.xlsx]

## Sheet: S3_Table
								Euclidean
	Naval Residents Puskesmas to Nearest Docks (CF10)
	Districts	# Ports	# Residents	# Routes	# Routes Euclidean		Districts	Name	Distance (km)
	Buru	67	60	12	48		Buru	Location 1 - Location 46	0.0709416
	South Buru	65	10	10	0		Buru	Location 12 - Location 42	0.0681694
	West Ceram	150	83	49	34		Buru	Location 16 - Location 64	0.180683
	Central Maluku	218	56	52	4		Buru	Location 17 - Location 64	0.367507
	Ambon						Buru	Location 27 - Location 66	0.135289
	East Ceram	152	56	32	24		Buru	Location 28 - Location 38	0.113203
	Tual	26	20	16	4		Buru	Location 35 - Location 2	0.104017
	Southeast Maluku	136	39	39	0		Buru	Location 36 - Location 28	0.137059
	Aru Islands	123	101	74	27		Buru	Location 40 - Location 14	0.104878
	West Southeast Maluku	103	42	26	16		Buru	Location 46 - Location 21	0.149489
	Southwest Maluku	125	83	51	32		Buru	Location 47 - Location 23	0.104686
	TOTAL	1165	550	361	189		Buru	Location 48 - Location 22	0.276087
							Buru	Location 2 - Location 44	0.226323
							Buru	Location 3 - Location 44	0.17073
							Buru	Location 4 - Location 65	21.4129
							Buru	Location 5 - Location 65	9.90982
							Buru	Location 6 - Location 65	10.7866
							Buru	Location 7 - Location 65	11.1589
							Buru	Location 8 - Location 65	10.2648
							Buru	Location 9 - Location 65	8.9936
							Buru	Location 10 - Location 65	12.2065
							Buru	Location 11 - Location 65	9.42285
							Buru	Location 13 - Location 65	9.61023
							Buru	Location 14 - Location 65	10.8226
							Buru	Location 15 - Location 65	8.06422
							Buru	Location 18 - Location 65	5.46073
							Buru	Location 19 - Location 65	0.97953
							Buru	Location 20 - Location 37	1.20901
							Buru	Location 21 - Location 54	1.41117
							Buru	Location 22 - Location 54	1.49902
							Buru	Location 23 - Location 37	1.47284
							Buru	Location 24 - Location 35	1.57542
							Buru	Location 25 - Location 52	1.11237
							Buru	Location 26 - Location 51	0.838894
							Buru	Location 29 - Location 51	1.41579
							Buru	Location 30 - Location 35	1.63557
							Buru	Location 31 - Location 66	0.795103
							Buru	Location 32 - Location 66	1.02943
							Buru	Location 33 - Location 34	0.842931
							Buru	Location 34 - Location 55	1.17903
							Buru	Location 37 - Location 20	5.19056
							Buru	Location 38 - Location 13	3.63705
							Buru	Location 39 - Location 26	0.170826
							Buru	Location 41 - Location 13	0.230265
							Buru	Location 42 - Location 15	1.12505
							Buru	Location 43 - Location 17	0.217229
							Buru	Location 44 - Location 58	0.784397
							Buru	Location 45 - Location 21	0.156032
							Buru	Location 49 - Location 5	0.347742
							Buru	Location 50 - Location 11	1.37821
							Buru	Location 51 - Location 14	0.465752
							Buru	Location 52 - Location 14	0.890181
							Buru	Location 53 - Location 15	0.816358
							Buru	Location 54 - Location 17	0.986596
							Buru	Location 55 - Location 17	1.47422
							Buru	Location 56 - Location 20	1.05522
							Buru	Location 57 - Location 56	0.0955925
							Buru	Location 58 - Location 33	0.251166
							Buru	Location 59 - Location 34	0.727579
							Buru	Location 60 - Location 34	1.51381
							South Buru	Location 1 - Location 59	0.550797
							South Buru	Location 2 - Location 19	0.142089
							South Buru	Location 3 - Location 22	2.08687
							South Buru	Location 4 - Location 22	0.148764
							South Buru	Location 5 - Location 32	0.00480485
							South Buru	Location 6 - Location 33	0.0012971
							South Buru	Location 7 - Location 42	0.0264651
							South Buru	Location 8 - Location 43	0
							South Buru	Location 9 - Location 43	0
							South Buru	Location 10 - Location 34	0.0236149
							West Ceram	Location 1 - Location 36	0
							West Ceram	Location 2 - Location 37	0.227524
							West Ceram	Location 3 - Location 110	0.185308
							West Ceram	Location 4 - Location 110	0.639392
							West Ceram	Location 5 - Location 38	0.13156
							West Ceram	Location 6 - Location 35	0.0185076
							West Ceram	Location 7 - Location 34	0
							West Ceram	Location 8 - Location 6	0.0629273
							West Ceram	Location 9 - Location 4	0.0181189
							West Ceram	Location 10 - Location 7	0.338676
							West Ceram	Location 11 - Location 96	0.00277271
							West Ceram	Location 12 - Location 30	0.179454
							West Ceram	Location 13 - Location 3	0.0613858
							West Ceram	Location 14 - Location 29	0
							West Ceram	Location 15 - Location 113	0.133344
							West Ceram	Location 17 - Location 2	0.00990346
							West Ceram	Location 18 - Location 29	0.133254
							West Ceram	Location 19 - Location 100	0.0460323
							West Ceram	Location 20 - Location 27	0.00102302
							West Ceram	Location 21 - Location 24	0.234765
							West Ceram	Location 23 - Location 24	0
							West Ceram	Location 24 - Location 12	0.138741
							West Ceram	Location 25 - Location 24	0
							West Ceram	Location 32 - Location 123	0.21175
							West Ceram	Location 33 - Location 23	0.161898
							West Ceram	Location 35 - Location 23	1.27769
							West Ceram	Location 37 - Location 21	0.313902
							West Ceram	Location 39 - Location 19	0.176028
							West Ceram	Location 44 - Location 91	0.176762
							West Ceram	Location 45 - Location 108	0
							West Ceram	Location 48 - Location 139	0.21094
							West Ceram	Location 58 - Location 12	0
							West Ceram	Location 59 - Location 12	0.101322
							West Ceram	Location 60 - Location 101	0
							West Ceram	Location 61 - Location 101	0
							West Ceram	Location 62 - Location 101	0
							West Ceram	Location 63 - Location 2	0.132507
							West Ceram	Location 64 - Location 3	0.18196
							West Ceram	Location 65 - Location 5	0.0150877
							West Ceram	Location 74 - Location 19	0.0113844
							West Ceram	Location 75 - Location 19	0
							West Ceram	Location 76 - Location 20	0
							West Ceram	Location 77 - Location 23	2.36957
							West Ceram	Location 78 - Location 28	0.945136
							West Ceram	Location 79 - Location 28	0.337592
							West Ceram	Location 80 - Location 110	0.209411
							West Ceram	Location 81 - Location 36	0.00912135
							West Ceram	Location 82 - Location 41	0.27148
							West Ceram	Location 83 - Location 123	0
							West Ceram	Location 16 - Location 10	1.95446
							West Ceram	Location 22 - Location 11	0.270716
							West Ceram	Location 26 - Location 15	0.0793961
							West Ceram	Location 27 - Location 14	0.125776
							West Ceram	Location 28 - Location 103	0.247461
							West Ceram	Location 29 - Location 102	0.394021
							West Ceram	Location 30 - Location 104	0.574064
							West Ceram	Location 31 - Location 13	0.184277
							West Ceram	Location 34 - Location 105	0.065297
							West Ceram	Location 36 - Location 105	1.65178
							West Ceram	Location 38 - Location 17	0.174159
							West Ceram	Location 40 - Location 121	1.98564
							West Ceram	Location 41 - Location 106	0.217592
							West Ceram	Location 42 - Location 107	0.185469
							West Ceram	Location 43 - Location 107	0.037744
							West Ceram	Location 46 - Location 121	4.26876
							West Ceram	Location 47 - Location 148	0.224385
							West Ceram	Location 49 - Location 94	0.142364
							West Ceram	Location 50 - Location 147	0.258139
							West Ceram	Location 51 - Location 95	0.0748726
							West Ceram	Location 52 - Location 95	2.77391
							West Ceram	Location 53 - Location 145	2.20133
							West Ceram	Location 54 - Location 145	0.0960755
							West Ceram	Location 55 - Location 92	0.0509545
							West Ceram	Location 56 - Location 146	0.227089
							West Ceram	Location 57 - Location 11	0.0789665
							West Ceram	Location 66 - Location 16	0.0779788
							West Ceram	Location 67 - Location 18	0.0518973
							West Ceram	Location 68 - Location 18	0.355774
							West Ceram	Location 69 - Location 18	1.24864
							West Ceram	Location 70 - Location 106	0.111787
							West Ceram	Location 71 - Location 105	0.26873
							West Ceram	Location 72 - Location 103	0.749086
							West Ceram	Location 73 - Location 15	0.708645
							Central Maluku	Location 1 - Location 2	0.0973811
							Central Maluku	Location 2 - Location 3	0.0837229
							Central Maluku	Location 3 - Location 4	0.0183053
							Central Maluku	Location 4 - Location 155	0.257454
							Central Maluku	Location 5 - Location 155	0.216912
							Central Maluku	Location 6 - Location 156	0.566614
							Central Maluku	Location 7 - Location 156	0.0881293
							Central Maluku	Location 8 - Location 66	0.104259
							Central Maluku	Location 9 - Location 183	0.111545
							Central Maluku	Location 10 - Location 145	0
							Central Maluku	Location 11 - Location 148	0.826203
							Central Maluku	Location 12 - Location 148	0.0993306
							Central Maluku	Location 13 - Location 186	0
							Central Maluku	Location 14 - Location 186	0
							Central Maluku	Location 15 - Location 186	0
							Central Maluku	Location 16 - Location 186	0
							Central Maluku	Location 17 - Location 202	0.389731
							Central Maluku	Location 18 - Location 202	0.533728
							Central Maluku	Location 19 - Location 202	0.171328
							Central Maluku	Location 20 - Location 143	0.0526869
							Central Maluku	Location 21 - Location 187	0.291163
							Central Maluku	Location 22 - Location 187	0.0799444
							Central Maluku	Location 23 - Location 187	0.236973
							Central Maluku	Location 26 - Location 191	0.938535
							Central Maluku	Location 27 - Location 191	0.711511
							Central Maluku	Location 28 - Location 191	0.538339
							Central Maluku	Location 29 - Location 191	0.972051
							Central Maluku	Location 30 - Location 191	1.63907
							Central Maluku	Location 31 - Location 188	0.424164
							Central Maluku	Location 32 - Location 188	0.631783
							Central Maluku	Location 33 - Location 188	0.629323
							Central Maluku	Location 34 - Location 189	0.237956
							Central Maluku	Location 35 - Location 188	0.243585
							Central Maluku	Location 36 - Location 190	0.0288288
							Central Maluku	Location 37 - Location 189	0.605425
							Central Maluku	Location 38 - Location 190	1.5545
							Central Maluku	Location 39 - Location 190	1.78718
							Central Maluku	Location 40 - Location 190	2.12228
							Central Maluku	Location 41 - Location 190	3.12693
							Central Maluku	Location 42 - Location 137	0
							Central Maluku	Location 43 - Location 137	0.193125
							Central Maluku	Location 44 - Location 137	0.110217
							Central Maluku	Location 45 - Location 1	0.0852045
							Central Maluku	Location 46 - Location 187	0.0954432
							Central Maluku	Location 47 - Location 189	0.0609399
							Central Maluku	Location 48 - Location 189	0.0104402
							Central Maluku	Location 49 - Location 189	0.158527
							Central Maluku	Location 50 - Location 189	0.158527
							Central Maluku	Location 52 - Location 144	0
							Central Maluku	Location 53 - Location 144	2.12895
							Central Maluku	Location 54 - Location 145	0
							Central Maluku	Location 55 - Location 146	0
							Central Maluku	Location 24 - Location 191	1.04697
							Central Maluku	Location 25 - Location 191	0.855259
							Central Maluku	Location 51 - Location 191	0.545564
							Central Maluku	Location 56 - Location 149	0.0862398
							East Ceram	Location 12 - Location 44	0.174458
							East Ceram	Location 13 - Location 43	0.371226
							East Ceram	Location 14 - Location 43	0.650527
							East Ceram	Location 15 - Location 42	0.189941
							East Ceram	Location 21 - Location 17	0.191712
							East Ceram	Location 25 - Location 139	0.0706739
							East Ceram	Location 26 - Location 106	0.704499
							East Ceram	Location 27 - Location 106	0.665881
							East Ceram	Location 28 - Location 106	0.7584
							East Ceram	Location 29 - Location 106	0.58614
							East Ceram	Location 30 - Location 106	0.208798
							East Ceram	Location 31 - Location 148	0
							East Ceram	Location 32 - Location 148	0.169328
							East Ceram	Location 33 - Location 105	0.148139
							East Ceram	Location 34 - Location 105	0.123274
							East Ceram	Location 35 - Location 105	0.123274
							East Ceram	Location 36 - Location 98	0.306586
							East Ceram	Location 37 - Location 99	0.569668
							East Ceram	Location 38 - Location 99	0.0932142
							East Ceram	Location 39 - Location 98	0.124807
							East Ceram	Location 40 - Location 147	0.271208
							East Ceram	Location 41 - Location 147	0.296275
							East Ceram	Location 42 - Location 147	0.131105
							East Ceram	Location 43 - Location 147	0.40324
							East Ceram	Location 44 - Location 97	0.298813
							East Ceram	Location 45 - Location 97	0.125023
							East Ceram	Location 46 - Location 97	1.09528
							East Ceram	Location 47 - Location 97	1.10861
							East Ceram	Location 48 - Location 97	1.33656
							East Ceram	Location 49 - Location 97	1.54175
							East Ceram	Location 50 - Location 96	0.0702617
							East Ceram	Location 56 - Location 139	0.122336
							East Ceram	Location 1 - Location 136	0.782619
							East Ceram	Location 2 - Location 73	0.195724
							East Ceram	Location 3 - Location 135	0.132534
							East Ceram	Location 4 - Location 72	0.114431
							East Ceram	Location 5 - Location 138	0.857693
							East Ceram	Location 6 - Location 137	0.970683
							East Ceram	Location 7 - Location 133	0.18576
							East Ceram	Location 8 - Location 72	0.984531
							East Ceram	Location 9 - Location 138	0.108283
							East Ceram	Location 10 - Location 128	0.455673
							East Ceram	Location 11 - Location 114	0.393735
							East Ceram	Location 16 - Location 55	3.58218
							East Ceram	Location 17 - Location 56	3.35444
							East Ceram	Location 18 - Location 56	3.34153
							East Ceram	Location 19 - Location 57	6.4947
							East Ceram	Location 20 - Location 118	4.22341
							East Ceram	Location 22 - Location 66	12.3869
							East Ceram	Location 23 - Location 67	13.2413
							East Ceram	Location 24 - Location 70	6.46218
							East Ceram	Location 51 - Location 134	0.493264
							East Ceram	Location 52 - Location 132	0.157179
							East Ceram	Location 53 - Location 137	0.361691
							East Ceram	Location 54 - Location 74	0.0667458
							East Ceram	Location 55 - Location 75	0.099363
							Tual	Location 1 - Location 18	0.209224
							Tual	Location 2 - Location 18	0.170505
							Tual	Location 3 - Location 5	0.139608
							Tual	Location 4 - Location 20	0.299579
							Tual	Location 5 - Location 20	0.238147
							Tual	Location 6 - Location 20	0.19799
							Tual	Location 7 - Location 20	0.126575
							Tual	Location 9 - Location 8	0.198714
							Tual	Location 10 - Location 8	0.261313
							Tual	Location 11 - Location 9	0.414509
							Tual	Location 13 - Location 13	0.66159
							Tual	Location 14 - Location 24	0
							Tual	Location 15 - Location 9	0.141107
							Tual	Location 16 - Location 8	0.196555
							Tual	Location 17 - Location 8	0.002124
							Tual	Location 18 - Location 18	0.147314
							Tual	Location 8 - Location 21	4.69363
							Tual	Location 12 - Location 25	2.14187
							Tual	Location 19 - Location 22	0.211274
							Tual	Location 20 - Location 26	0.186181
							Southeast Maluku	Location 1 - Location 35	0.109869
							Southeast Maluku	Location 2 - Location 50	0.119569
							Southeast Maluku	Location 3 - Location 50	0.251507
							Southeast Maluku	Location 4 - Location 51	0.0777961
							Southeast Maluku	Location 5 - Location 56	1.08993
							Southeast Maluku	Location 6 - Location 56	1.38336
							Southeast Maluku	Location 7 - Location 56	2.12837
							Southeast Maluku	Location 8 - Location 124	0.174015
							Southeast Maluku	Location 9 - Location 55	1.12725
							Southeast Maluku	Location 10 - Location 55	0.552995
							Southeast Maluku	Location 11 - Location 55	0.116694
							Southeast Maluku	Location 12 - Location 53	0.0623111
							Southeast Maluku	Location 13 - Location 54	1.04561
							Southeast Maluku	Location 14 - Location 123	0.157487
							Southeast Maluku	Location 15 - Location 123	0.0638273
							Southeast Maluku	Location 16 - Location 113	0.821872
							Southeast Maluku	Location 17 - Location 113	0.642428
							Southeast Maluku	Location 18 - Location 113	0.713711
							Southeast Maluku	Location 19 - Location 113	0.152734
							Southeast Maluku	Location 20 - Location 1	0.100442
							Southeast Maluku	Location 21 - Location 132	0
							Southeast Maluku	Location 22 - Location 133	0.105656
							Southeast Maluku	Location 23 - Location 134	0.0968188
							Southeast Maluku	Location 24 - Location 134	0.150345
							Southeast Maluku	Location 25 - Location 72	0.163408
							Southeast Maluku	Location 26 - Location 112	0.122151
							Southeast Maluku	Location 27 - Location 71	0.29601
							Southeast Maluku	Location 28 - Location 110	0.107684
							Southeast Maluku	Location 29 - Location 111	0.506086
							Southeast Maluku	Location 30 - Location 111	0.551149
							Southeast Maluku	Location 31 - Location 83	0.0932602
							Southeast Maluku	Location 32 - Location 115	0.216074
							Southeast Maluku	Location 33 - Location 115	0.0272891
							Southeast Maluku	Location 34 - Location 98	0
							Southeast Maluku	Location 35 - Location 110	0
							Southeast Maluku	Location 36 - Location 54	0.0721464
							Southeast Maluku	Location 37 - Location 56	0.0983007
							Southeast Maluku	Location 38 - Location 56	0.313515
							Southeast Maluku	Location 39 - Location 134	0.150345
							Aru Islands	Location 4 - Location 118	1.08564
							Aru Islands	Location 5 - Location 27	0.0704168
							Aru Islands	Location 6 - Location 28	0.0610393
							Aru Islands	Location 8 - Location 46	0.0796826
							Aru Islands	Location 9 - Location 117	0.213658
							Aru Islands	Location 10 - Location 14	0
							Aru Islands	Location 11 - Location 48	0.0597599
							Aru Islands	Location 12 - Location 31	0.158377
							Aru Islands	Location 13 - Location 65	0.169406
							Aru Islands	Location 14 - Location 40	0.22576
							Aru Islands	Location 15 - Location 67	0.188854
							Aru Islands	Location 17 - Location 66	0.135463
							Aru Islands	Location 18 - Location 9	0.172501
							Aru Islands	Location 19 - Location 33	0.0789112
							Aru Islands	Location 23 - Location 7	0.146526
							Aru Islands	Location 24 - Location 35	0.0990435
							Aru Islands	Location 26 - Location 71	0.289294
							Aru Islands	Location 27 - Location 62	0.28402
							Aru Islands	Location 28 - Location 63	0.111585
							Aru Islands	Location 30 - Location 55	0.246164
							Aru Islands	Location 33 - Location 72	0.170358
							Aru Islands	Location 34 - Location 54	1.24004
							Aru Islands	Location 35 - Location 54	2.5952
							Aru Islands	Location 36 - Location 92	0.170969
							Aru Islands	Location 37 - Location 91	0.0985356
							Aru Islands	Location 39 - Location 90	0.0377897
							Aru Islands	Location 40 - Location 100	0.0500528
							Aru Islands	Location 41 - Location 101	0.0116803
							Aru Islands	Location 42 - Location 73	0.262766
							Aru Islands	Location 43 - Location 102	0.102483
							Aru Islands	Location 44 - Location 85	0.364147
							Aru Islands	Location 45 - Location 18	0.0354203
							Aru Islands	Location 46 - Location 103	0.0969817
							Aru Islands	Location 47 - Location 81	0.241661
							Aru Islands	Location 48 - Location 80	0.435319
							Aru Islands	Location 49 - Location 104	0.311457
							Aru Islands	Location 50 - Location 104	0.258038
							Aru Islands	Location 51 - Location 104	27.5106
							Aru Islands	Location 53 - Location 105	0.0512209
							Aru Islands	Location 54 - Location 105	2.72197
							Aru Islands	Location 55 - Location 106	0.0848861
							Aru Islands	Location 57 - Location 79	0.20216
							Aru Islands	Location 58 - Location 78	0.0357605
							Aru Islands	Location 60 - Location 77	0.144966
							Aru Islands	Location 61 - Location 3	0.114521
							Aru Islands	Location 62 - Location 108	0.2199
							Aru Islands	Location 63 - Location 4	0.104934
							Aru Islands	Location 65 - Location 115	0.107383
							Aru Islands	Location 66 - Location 114	0.188452
							Aru Islands	Location 67 - Location 6	0.169791
							Aru Islands	Location 68 - Location 2	0.275019
							Aru Islands	Location 69 - Location 5	0.141288
							Aru Islands	Location 70 - Location 1	0.0522825
							Aru Islands	Location 71 - Location 110	0.135396
							Aru Islands	Location 72 - Location 122	0.118924
							Aru Islands	Location 73 - Location 111	0.0880883
							Aru Islands	Location 74 - Location 86	0.267677
							Aru Islands	Location 75 - Location 86	0.377159
							Aru Islands	Location 78 - Location 19	0.0887065
							Aru Islands	Location 82 - Location 118	0.599701
							Aru Islands	Location 83 - Location 10	0.179104
							Aru Islands	Location 87 - Location 54	7.97999
							Aru Islands	Location 88 - Location 54	8.57383
							Aru Islands	Location 89 - Location 85	0.256858
							Aru Islands	Location 90 - Location 18	0.0979353
							Aru Islands	Location 91 - Location 74	0.123697
							Aru Islands	Location 92 - Location 109	0.193055
							Aru Islands	Location 93 - Location 76	0.0840825
							Aru Islands	Location 96 - Location 113	0.311772
							Aru Islands	Location 97 - Location 29	0.0359066
							Aru Islands	Location 98 - Location 14	0.0672732
							Aru Islands	Location 99 - Location 84	0.191675
							Aru Islands	Location 100 - Location 119	0.0841158
							Aru Islands	Location 101 - Location 82	0.299515
							Aru Islands	Location 1 - Location 25	0.187642
							Aru Islands	Location 2 - Location 25	5.98798
							Aru Islands	Location 3 - Location 49	0.153797
							Aru Islands	Location 7 - Location 13	12.6303
							Aru Islands	Location 16 - Location 32	0.0631456
							Aru Islands	Location 20 - Location 70	5.93612
							Aru Islands	Location 21 - Location 64	6.34306
							Aru Islands	Location 22 - Location 64	0.285138
							Aru Islands	Location 25 - Location 70	8.51024
							Aru Islands	Location 29 - Location 72	12.062
							Aru Islands	Location 31 - Location 34	4.55513
							Aru Islands	Location 32 - Location 34	5.19532
							Aru Islands	Location 38 - Location 53	0.266619
							Aru Islands	Location 52 - Location 105	2.25944
							Aru Islands	Location 56 - Location 104	14.5956
							Aru Islands	Location 59 - Location 107	10.8741
							Aru Islands	Location 64 - Location 121	8.47292
							Aru Islands	Location 76 - Location 123	1.57812
							Aru Islands	Location 77 - Location 123	0.288174
							Aru Islands	Location 79 - Location 21	0.16336
							Aru Islands	Location 80 - Location 51	0.265486
							Aru Islands	Location 81 - Location 51	0.195819
							Aru Islands	Location 84 - Location 8	0.555451
							Aru Islands	Location 85 - Location 8	1.46553
							Aru Islands	Location 86 - Location 8	2.41
							Aru Islands	Location 94 - Location 107	14.6502
							Aru Islands	Location 95 - Location 107	18.9607
							West Southeast Maluku	Location 1 - Location 97	0
							West Southeast Maluku	Location 2 - Location 97	0.126842
							West Southeast Maluku	Location 3 - Location 58	0.132547
							West Southeast Maluku	Location 4 - Location 59	0.00802296
							West Southeast Maluku	Location 6 - Location 82	0.109756
							West Southeast Maluku	Location 7 - Location 80	0.0249671
							West Southeast Maluku	Location 8 - Location 23	0.0296504
							West Southeast Maluku	Location 9 - Location 23	1.30179
							West Southeast Maluku	Location 10 - Location 4	0.0519102
							West Southeast Maluku	Location 11 - Location 2	0.0945608
							West Southeast Maluku	Location 12 - Location 2	0.130343
							West Southeast Maluku	Location 16 - Location 19	0.081251
							West Southeast Maluku	Location 17 - Location 20	0.247461
							West Southeast Maluku	Location 18 - Location 20	0.459773
							West Southeast Maluku	Location 19 - Location 101	0.098047
							West Southeast Maluku	Location 20 - Location 62	0.178314
							West Southeast Maluku	Location 21 - Location 48	0.0642855
							West Southeast Maluku	Location 22 - Location 71	0
							West Southeast Maluku	Location 23 - Location 49	0.179228
							West Southeast Maluku	Location 25 - Location 18	0.0680784
							West Southeast Maluku	Location 26 - Location 1	0.202138
							West Southeast Maluku	Location 27 - Location 3	0.150158
							West Southeast Maluku	Location 32 - Location 54	0.0420088
							West Southeast Maluku	Location 33 - Location 81	0
							West Southeast Maluku	Location 34 - Location 80	0.0834643
							West Southeast Maluku	Location 36 - Location 48	1.45905
							West Southeast Maluku	Location 5 - Location 57	0.15732
							West Southeast Maluku	Location 13 - Location 93	0.347881
							West Southeast Maluku	Location 14 - Location 55	0.13678
							West Southeast Maluku	Location 15 - Location 56	0.169069
							West Southeast Maluku	Location 24 - Location 52	0.15518
							West Southeast Maluku	Location 28 - Location 5	0.0889402
							West Southeast Maluku	Location 29 - Location 7	0.0941815
							West Southeast Maluku	Location 30 - Location 6	0.0595587
							West Southeast Maluku	Location 31 - Location 79	0.160236
							West Southeast Maluku	Location 35 - Location 55	0.168029
							West Southeast Maluku	Location 37 - Location 50	5.67148
							West Southeast Maluku	Location 38 - Location 68	7.69335
							West Southeast Maluku	Location 39 - Location 67	0.055608
							West Southeast Maluku	Location 40 - Location 68	0.0679002
							West Southeast Maluku	Location 41 - Location 69	0.0474986
							West Southeast Maluku	Location 42 - Location 70	0.0641601
							Southwest Maluku	Location 3 - Location 38	0
							Southwest Maluku	Location 4 - Location 111	0.11247
							Southwest Maluku	Location 5 - Location 72	0.0124979
							Southwest Maluku	Location 6 - Location 73	0.331581
							Southwest Maluku	Location 9 - Location 67	0.143787
							Southwest Maluku	Location 13 - Location 70	0
							Southwest Maluku	Location 14 - Location 86	0.0187172
							Southwest Maluku	Location 16 - Location 81	0.685943
							Southwest Maluku	Location 17 - Location 81	3.27097
							Southwest Maluku	Location 18 - Location 77	0.0061705
							Southwest Maluku	Location 19 - Location 76	0
							Southwest Maluku	Location 21 - Location 88	0
							Southwest Maluku	Location 22 - Location 109	0.314039
							Southwest Maluku	Location 24 - Location 106	1.00672
							Southwest Maluku	Location 26 - Location 118	0.463909
							Southwest Maluku	Location 34 - Location 98	0.191827
							Southwest Maluku	Location 35 - Location 97	0
							Southwest Maluku	Location 39 - Location 10	0.0741178
							Southwest Maluku	Location 40 - Location 11	0.405318
							Southwest Maluku	Location 41 - Location 11	0.0765943
							Southwest Maluku	Location 42 - Location 11	0.560398
							Southwest Maluku	Location 43 - Location 11	0.573908
							Southwest Maluku	Location 44 - Location 11	0.306765
							Southwest Maluku	Location 45 - Location 11	0.256799
							Southwest Maluku	Location 46 - Location 100	0.0340735
							Southwest Maluku	Location 47 - Location 100	0.255942
							Southwest Maluku	Location 48 - Location 28	0.00319448
							Southwest Maluku	Location 49 - Location 28	0.774055
							Southwest Maluku	Location 52 - Location 12	0.317196
							Southwest Maluku	Location 53 - Location 30	0.0657712
							Southwest Maluku	Location 54 - Location 31	0.125467
							Southwest Maluku	Location 55 - Location 32	0.730754
							Southwest Maluku	Location 56 - Location 32	0.0927258
							Southwest Maluku	Location 57 - Location 30	4.71347
							Southwest Maluku	Location 58 - Location 29	4.22914
							Southwest Maluku	Location 59 - Location 33	0.00332308
							Southwest Maluku	Location 60 - Location 29	1.12823
							Southwest Maluku	Location 61 - Location 34	0.00124832
							Southwest Maluku	Location 62 - Location 35	0.249517
							Southwest Maluku	Location 63 - Location 35	0.372111
							Southwest Maluku	Location 65 - Location 27	0.0540715
							Southwest Maluku	Location 66 - Location 27	0.0330195
							Southwest Maluku	Location 67 - Location 29	2.08718
							Southwest Maluku	Location 68 - Location 32	0.845075
							Southwest Maluku	Location 71 - Location 118	0.0619527
							Southwest Maluku	Location 72 - Location 53	1.87511
							Southwest Maluku	Location 79 - Location 72	1.05026
							Southwest Maluku	Location 80 - Location 72	2.48856
							Southwest Maluku	Location 81 - Location 74	0.155386
							Southwest Maluku	Location 82 - Location 97	0.0935582
							Southwest Maluku	Location 83 - Location 97	0
							Southwest Maluku	Location 1 - Location 113	4.86868
							Southwest Maluku	Location 2 - Location 113	5.05592
							Southwest Maluku	Location 7 - Location 66	0.149297
							Southwest Maluku	Location 8 - Location 121	0.13186
							Southwest Maluku	Location 10 - Location 87	0.0608524
							Southwest Maluku	Location 11 - Location 124	0.245644
							Southwest Maluku	Location 12 - Location 69	0.162256
							Southwest Maluku	Location 15 - Location 85	0.146414
							Southwest Maluku	Location 20 - Location 80	0.0757227
							Southwest Maluku	Location 23 - Location 88	10.3444
							Southwest Maluku	Location 25 - Location 48	5.96089
							Southwest Maluku	Location 27 - Location 40	0.990781
							Southwest Maluku	Location 28 - Location 41	2.17792
							Southwest Maluku	Location 29 - Location 89	15.1029
							Southwest Maluku	Location 30 - Location 89	14.1227
							Southwest Maluku	Location 31 - Location 89	13.8575
							Southwest Maluku	Location 32 - Location 89	15.9469
							Southwest Maluku	Location 33 - Location 89	14.5083
							Southwest Maluku	Location 36 - Location 96	0.108107
							Southwest Maluku	Location 37 - Location 95	0.19012
							Southwest Maluku	Location 38 - Location 96	0.903508
							Southwest Maluku	Location 50 - Location 13	0.146378
							Southwest Maluku	Location 51 - Location 14	0.085371
							Southwest Maluku	Location 64 - Location 15	0.139392
							Southwest Maluku	Location 69 - Location 40	0.289977
							Southwest Maluku	Location 70 - Location 41	0.203402
							Southwest Maluku	Location 73 - Location 106	3.58445
							Southwest Maluku	Location 74 - Location 78	0.284191
							Southwest Maluku	Location 75 - Location 79	0.165063
							Southwest Maluku	Location 76 - Location 84	0.163258
							Southwest Maluku	Location 77 - Location 68	0.105679
							Southwest Maluku	Location 78 - Location 124	0.244224
